# Supplementary material for: IFN-γ from lymphocytes induces PD-L1 expression and promotes progression of ovarian cancer
Source: Springer Nature journal article supplement (doi:10.1038/bjc.2015.101), 2015-03-31

Supplementary Figure S1 *Abiko et al.*

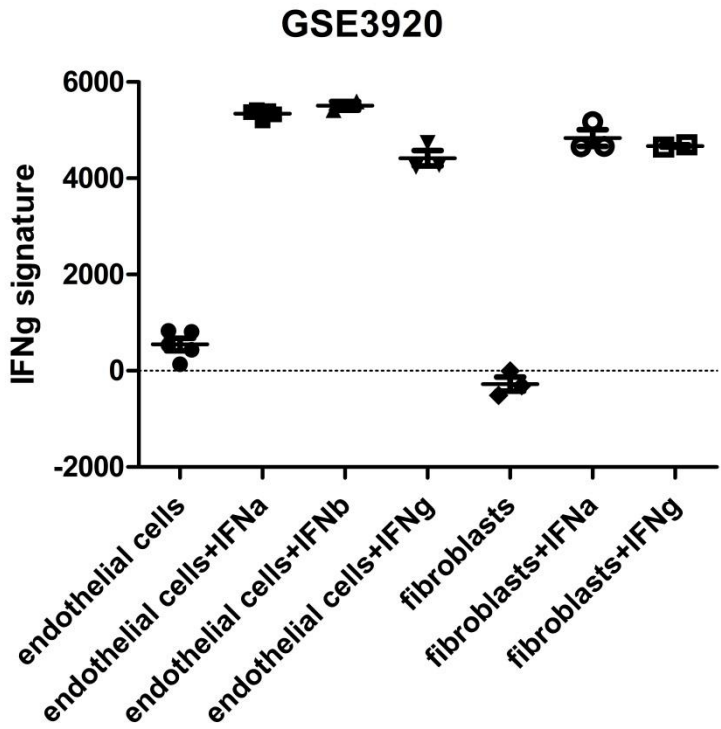

Supplementary Figure S2 *Abiko et al.*

A

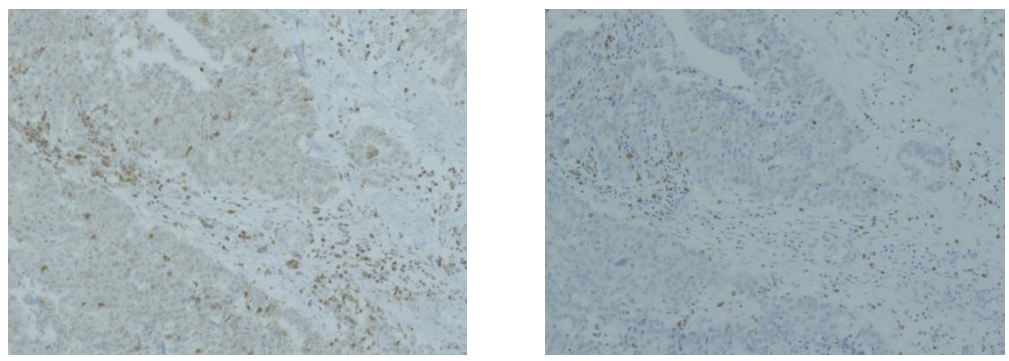

CD4

CD8

B

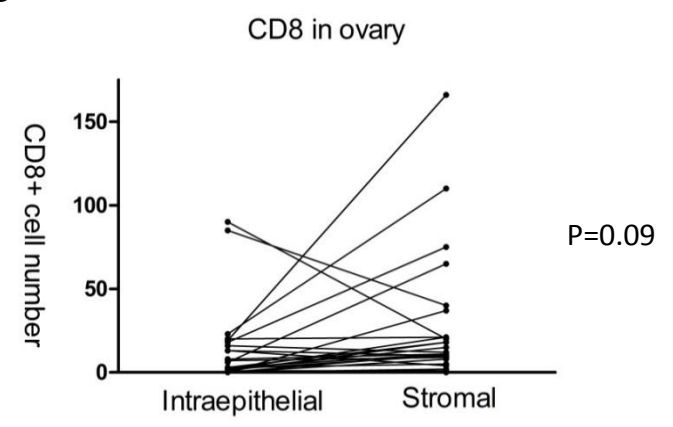

C

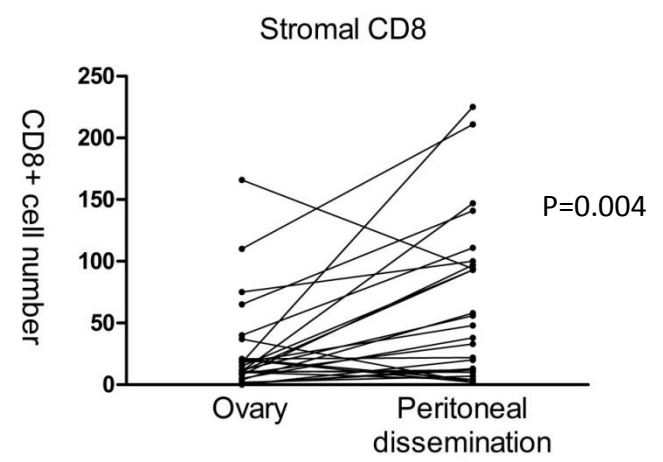

D

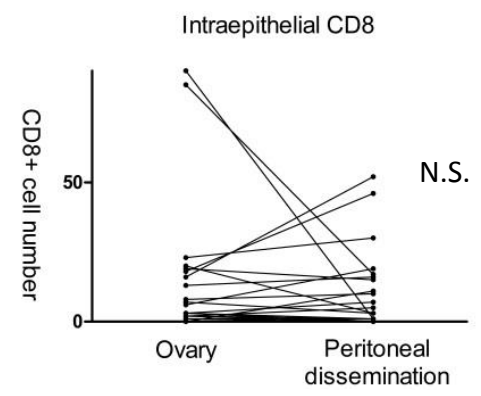

E

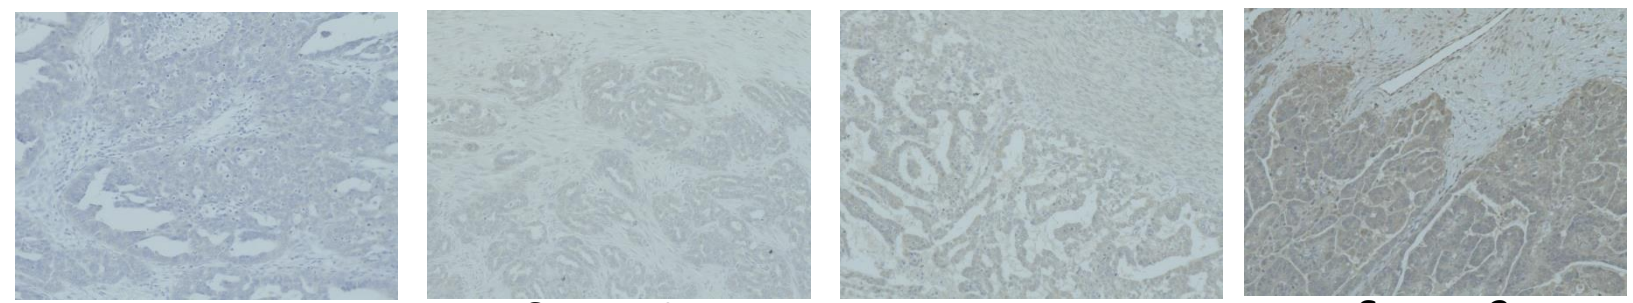

Score: 0

Score: 1

Score: 2

Score: 3

Supplementary Figure S3 *Abiko et al.*

A

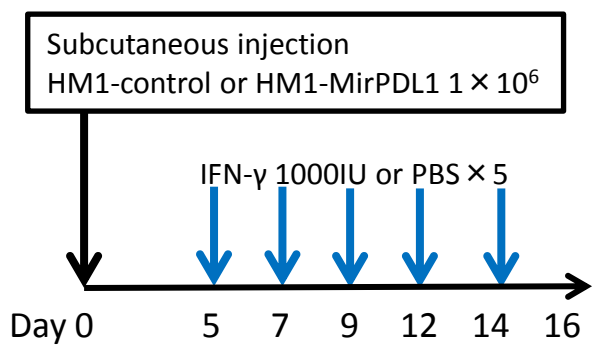

C

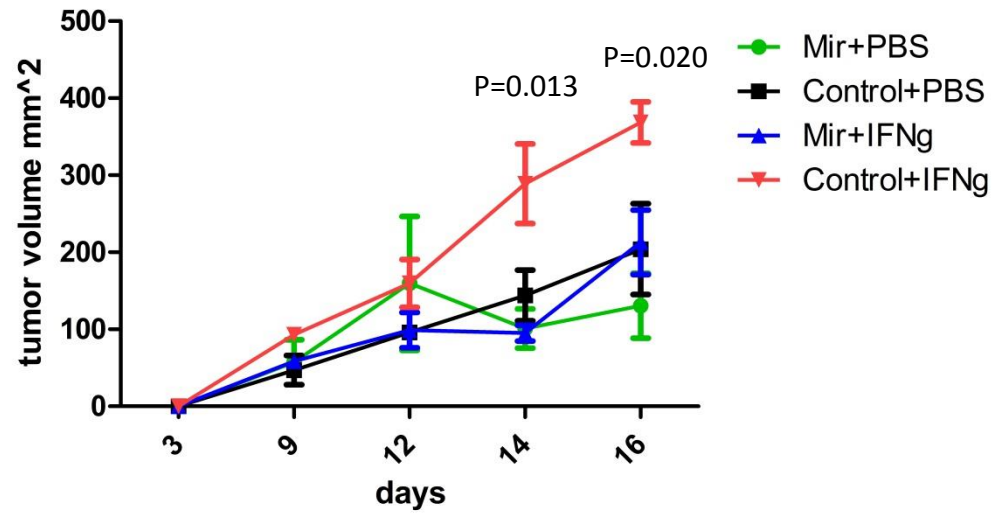

B

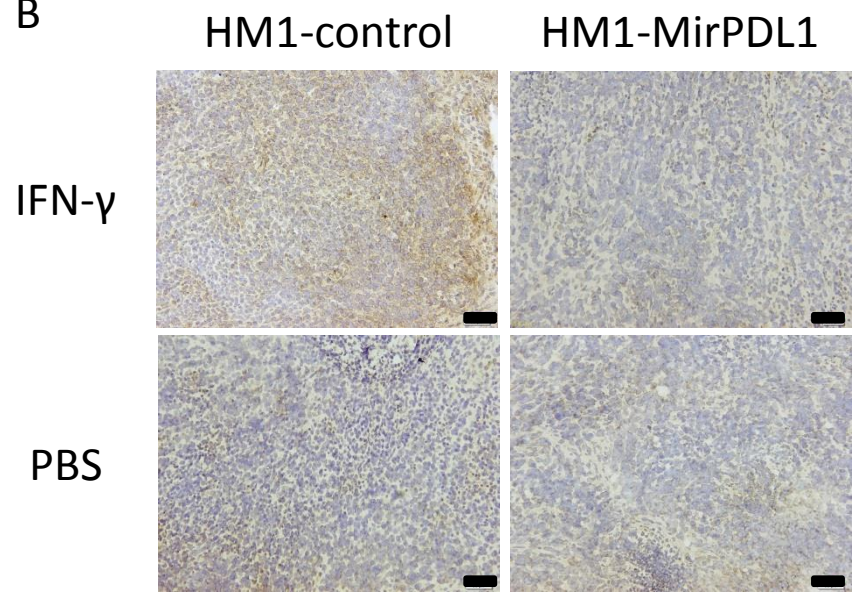

D

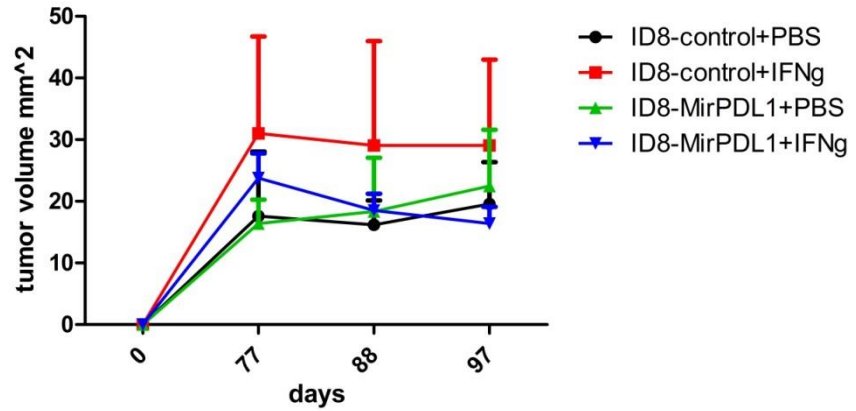

# Supplementary Figure S4 *Abiko et al.*

A

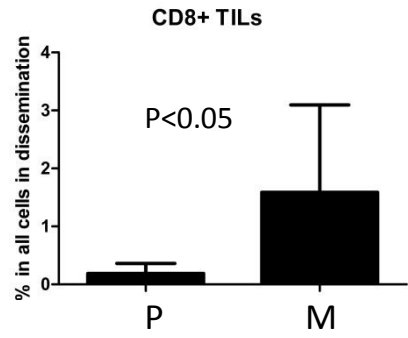

B

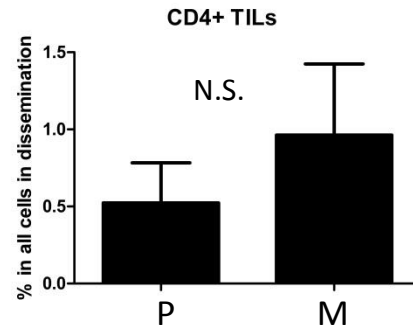

C

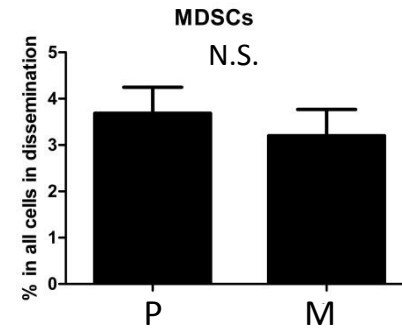

Supplement: 41416_2015_BFbjc2015101_MOESM1_ESM.pdf [file 41416_2015_BFbjc2015101_MOESM1_ESM.pdf]
