# Supplementary material for: IFN-γ from lymphocytes induces PD-L1 expression and promotes progression of ovarian cancer
Source: Springer Nature journal article supplement (doi:10.1038/bjc.2015.101), 2015-03-31
Supplement: 41416_2015_BFbjc2015101_MOESM2_ESM.pdf [file 41416_2015_BFbjc2015101_MOESM2_ESM.pdf]

Supplementary Table S1 Clinical Characteristics of 27 pair cases

Supplementary Table S2 Clinical Characteristics of KOV-75

Supplementary Table S3 IFN- $\gamma$  signature genes

Supplementary Table S4 Lymphocyte count in KOV-75

Supplementary Figure S1

IFN- $\gamma$  signature scores in IFN-treated cells from GSE 3920 datasets. IFNa; IFN- $\alpha$ , IFNb; IFN- $\beta$ , IFNg; IFN- $\gamma$ .

Supplementary Figure S2

A, Representative images of immunohistochemistry for CD4 and CD8.

B, Number of intraepithelial and stromal CD8-positive cells in primary ovarian tumors.

C, Number of stromal CD8-positive cells in 27 pairs of primary ovarian tumors and their peritoneal dissemination.

D, Number of intraepithelial CD8-positive cells in the same cases as in Supplementary Figure S2C. No significance between two groups.

E, Immunohistochemistry for PD-L1 was performed in a serial section as CD8 immunohistochemistry. Representative cases for PD-L1 score 0, 1, 2, 3 are shown.

Supplementary Figure S3

**IFN- $\gamma$  facilitated tumor growth through PD-L1 induction in a mouse subcutaneous model.**

A, Protocol scheme for the experiment. 5 days after subcutaneous inoculation with HM1-Mircontrol or HM1-Mirpd11 cells, the mice were locally injected with mouse IFN- $\gamma$  1000IU or PBS five times.

B, Representative images of immunohistochemistry for PD-L1 in mouse subcutaneous tumors. The HM1-Mircontrol treated with IFN- $\gamma$  showed high expression of PD-L1 (upper left). Bars; 50 $\mu$ m.

C, Growth of subcutaneous HM1-Mircontrol or HM1-Mirpd11 tumors after local injection of PBS or IFN- $\gamma$ . The HM1-Mircontrol with IFN- $\gamma$  treatment (red line) showed

the fastest tumor growth, while growth was completely abrogated in HM1-Mirpd11 tumors (blue line) (n=3).

D, Growth of subcutaneous ID8-Mircontrol or ID8-Mirpd11 tumors after local injection of PBS or IFN- $\gamma$ . n=5.

Supplementary Figure S4

**PD-L1 expression on tumor cells inhibits infiltration of CD8-positive lymphocytes into the tumor.**

A, CD8<sup>+</sup> tumor infiltrating lymphocytes (TILs) is shown in percentage to the all cells in the disseminated tumor of HM1-pdl1 (P) or HM1-Mirpd11 (M). n=6, P<0.05. CD3-positive and CD8-positive cells were gated.

B, CD4<sup>+</sup> TILs. n=6, N.S.: no significant difference. CD3- and CD8-positive cells were gated.

C, MDSCs is shown in percentage to the all cells in the tumor. CD11b-positive Gr1-positive cells were gated.
